# Supplementary material for: SKELETAL MUSCLE CHANGES IN THE FIRST THREE MONTHS OF STROKE RECOVERY: A SYSTEMATIC REVIEW
Source: PubMed Central journal article supplement — J Rehabil Med. 2022 Oct 4;54:573. doi: 10.2340/jrm.v54.573 (PMC9575591; doi:10.2340/jrm.v54.573), 2022-10-04
Supplement: JRM-54-573-s001.pdf [file JRM-54-573-s001.pdf]

## APPENDIX 1. SEARCH STRATEGY.

In Appendix A is the full electronic search strategies in:

- MEDLINE (Table SI)
- SCOPUS (Table SII)
- CENTRAL (Table SIII)

**Table SI.** Complete search strategy in the electronic database MEDLINE structured according to the PICO (Population Intervention Comparison Outcome) method

| Search | PICO | Query                                                                                                                                                                                                                                                                                                                                                                                                                                                                                                                                                                                                                                                                                                                                                                                                                                                                                                                                                                                                                                                                                                                                                                                                                                                                                                                                                                                                                                                                                                                                                                                                                                                                                                                                                                                                                                                                                                                                                                                                                                                                                                                                                                                                                   |
|--------|------|-------------------------------------------------------------------------------------------------------------------------------------------------------------------------------------------------------------------------------------------------------------------------------------------------------------------------------------------------------------------------------------------------------------------------------------------------------------------------------------------------------------------------------------------------------------------------------------------------------------------------------------------------------------------------------------------------------------------------------------------------------------------------------------------------------------------------------------------------------------------------------------------------------------------------------------------------------------------------------------------------------------------------------------------------------------------------------------------------------------------------------------------------------------------------------------------------------------------------------------------------------------------------------------------------------------------------------------------------------------------------------------------------------------------------------------------------------------------------------------------------------------------------------------------------------------------------------------------------------------------------------------------------------------------------------------------------------------------------------------------------------------------------------------------------------------------------------------------------------------------------------------------------------------------------------------------------------------------------------------------------------------------------------------------------------------------------------------------------------------------------------------------------------------------------------------------------------------------------|
| 1      | P    | Search (((((((("stroke"[MeSH Terms] OR "Stroke"[Title/Abstract]) OR "Cerebral Apoplexy"[Title/Abstract]) OR "Cerebrovascular Apoplexy"[Title/Abstract]) OR "Cerebrovascular Accident"[Title/Abstract]) OR "Cerebrovascular Accidents"[Title/Abstract]) OR "Cerebral Vascular Accident"[Title/Abstract]) OR "Cerebral Vascular Accidents"[Title/Abstract]) OR "CVA"[Title/Abstract]) OR "CVAs"[Title/Abstract])) AND (((("Acute"[Title/Abstract]) OR "Subacute"[Title/Abstract]) OR "Sub-acute"[Title/Abstract])                                                                                                                                                                                                                                                                                                                                                                                                                                                                                                                                                                                                                                                                                                                                                                                                                                                                                                                                                                                                                                                                                                                                                                                                                                                                                                                                                                                                                                                                                                                                                                                                                                                                                                         |
| 2      | O    | Search (((((((((((((((((((((((((((((((((((((((("Muscle, Skeletal"[Mesh] OR "Skeletal Muscle"[Title/Abstract]) OR "Muscular atrophy"[MeSH Terms] OR "Muscular atrophy"[Title/Abstract]) OR "Muscular atrophies"[Title/Abstract]) OR "Muscular atrophias"[Title/Abstract]) OR "Muscle Wasting"[Title/Abstract]) OR "Muscle Degeneration"[Title/Abstract]) OR "Sarcopenia"[MeSH Terms]) OR "Sarcopenia"[Title/Abstract]) OR "Sarcopenic"[Title/Abstract]) OR "Muscle mass"[Title/Abstract]) OR "Lean mass"[Title/Abstract]) OR "Lean tissue"[Title/Abstract]) OR "Muscle Strength"[MeSH Terms]) OR "Muscle Strength"[Title/Abstract]) OR "Muscle Strengths"[Title/Abstract]) OR "Muscular Strength"[Title/Abstract]) OR "Muscular Power"[Title/Abstract]) OR "Muscular Force"[Title/Abstract]) OR "Muscle Power"[Title/Abstract]) OR "Muscle Force"[Title/Abstract]) OR "Muscle Weakness"[MeSH Terms]) OR "Muscle Weakness"[Title/Abstract]) OR "Muscle Weaknesses"[Title/Abstract]) OR "Muscle Weakening"[Title/Abstract]) OR "Muscular Weakness"[Title/Abstract]) OR "Paresis"[MeSH Terms]) OR "Paresis"[Title/Abstract]) OR "Paretic"[Title/Abstract]) OR "Muscle function"[Title/Abstract]) OR "Muscle functions"[Title/Abstract]) OR "Muscle functioning"[Title/Abstract]) OR "Muscle functionality"[Title/Abstract]) OR "Muscle Performance"[Title/Abstract]) OR "Muscle Work"[Title/Abstract]) OR "Muscular Function"[Title/Abstract]) OR "Muscular Work"[Title/Abstract]) OR "Muscular Effort"[Title/Abstract]) OR "Muscle structure"[Title/Abstract]) OR "Muscle structures"[Title/Abstract]) OR "Muscle size"[Title/Abstract]) OR "Muscle sizes"[Title/Abstract]) OR "Muscle volume"[Title/Abstract]) OR "Muscle volumes"[Title/Abstract]) OR "Muscle thickness"[Title/Abstract]) OR "Muscle fibers, Skeletal"[MeSH Terms]) OR "Muscle fibre"[Title/Abstract]) OR "Muscle fibres"[Title/Abstract]) OR "Muscle fiber"[Title/Abstract]) OR "Muscle fibers"[Title/Abstract]) OR "Muscle fibers, Slow-Twitch"[MeSH Terms]) OR "Slow-Twitch"[Title/Abstract]) OR "Muscle fibers, Fast-Twitch"[MeSH Terms]) OR "Fast-Twitch"[Title/Abstract]) OR "Motor unit"[Title/Abstract]) OR "Motor units"[Title/Abstract])))]))) |
| 3      | PO   | Search (#1 AND #2)                                                                                                                                                                                                                                                                                                                                                                                                                                                                                                                                                                                                                                                                                                                                                                                                                                                                                                                                                                                                                                                                                                                                                                                                                                                                                                                                                                                                                                                                                                                                                                                                                                                                                                                                                                                                                                                                                                                                                                                                                                                                                                                                                                                                      |

Search 3 was used to find eligible records

**Table SII.** Complete search strategy in the electronic database SCOPUS structured according to the PICO (Population Intervention Comparison Outcome) method

| Search | PICO | Query                                                                                                                                                                                                                                                                                                                                                                                                                                                                                                                                                                                                                                                                                                                                                                                                                                                                                                                                                                                                                                                                                                                                                                                                                                                                                                                                                                                                                                                                                                                                                                                                                                                                                                                                                                                                                                                                                                                                                                                                                                                                               |
|--------|------|-------------------------------------------------------------------------------------------------------------------------------------------------------------------------------------------------------------------------------------------------------------------------------------------------------------------------------------------------------------------------------------------------------------------------------------------------------------------------------------------------------------------------------------------------------------------------------------------------------------------------------------------------------------------------------------------------------------------------------------------------------------------------------------------------------------------------------------------------------------------------------------------------------------------------------------------------------------------------------------------------------------------------------------------------------------------------------------------------------------------------------------------------------------------------------------------------------------------------------------------------------------------------------------------------------------------------------------------------------------------------------------------------------------------------------------------------------------------------------------------------------------------------------------------------------------------------------------------------------------------------------------------------------------------------------------------------------------------------------------------------------------------------------------------------------------------------------------------------------------------------------------------------------------------------------------------------------------------------------------------------------------------------------------------------------------------------------------|
| 1      | P    | Search ( ( TITLE-ABS-KEY ( stroke ) ) OR ( TITLE-ABS-KEY ( "Cerebrovascular Apoplexy" ) ) OR ( TITLE-ABS-KEY ( "Cerebral Apoplexy" ) ) OR ( TITLE-ABS-KEY ( "Cerebrovascular Accident" ) ) OR ( TITLE-ABS-KEY ( "Cerebrovascular Accidents" ) ) OR ( TITLE-ABS-KEY ( "Cerebral Vascular Accident" ) ) OR ( TITLE-ABS-KEY ( "Cerebral Vascular Accidents" ) ) OR ( TITLE-ABS-KEY ( cva ) ) OR ( TITLE-ABS-KEY ( cvas ) ) ) AND ( ( TITLE-ABS-KEY ( acute ) ) OR ( TITLE-ABS-KEY ( subacute ) ) OR ( TITLE-ABS-KEY ( sub-acute ) ) ) )                                                                                                                                                                                                                                                                                                                                                                                                                                                                                                                                                                                                                                                                                                                                                                                                                                                                                                                                                                                                                                                                                                                                                                                                                                                                                                                                                                                                                                                                                                                                                |
| 2      | O    | ( TITLE-ABS-KEY ( "Skeletal muscle" ) ) OR ( TITLE-ABS-KEY ( "Muscular atrophy" ) ) OR ( TITLE-ABS-KEY ( "Muscular atrophies" ) ) OR ( TITLE-ABS-KEY ( "Muscular atrophgia" ) ) OR ( TITLE-ABS-KEY ( "Muscle Wasting" ) ) OR ( TITLE-ABS-KEY ( "Muscle Degeneration" ) ) OR ( TITLE-ABS-KEY ( "Sarcopenia" ) ) OR ( TITLE-ABS-KEY ( sarcopenic ) ) OR ( TITLE-ABS-KEY ( "Muscle Mass" ) ) OR ( TITLE-ABS-KEY ( "Lean mass" ) ) OR ( TITLE-ABS-KEY ( "Lean tissue" ) ) OR ( TITLE-ABS-KEY ( "Muscle strength" ) ) OR ( TITLE-ABS-KEY ( "Muscle strengths" ) ) OR ( TITLE-ABS-KEY ( "Muscular Strength" ) ) OR ( TITLE-ABS-KEY ( "Muscle Force" ) ) OR ( TITLE-ABS-KEY ( "Muscular Force" ) ) OR ( TITLE-ABS-KEY ( "Muscle Power" ) ) OR ( TITLE-ABS-KEY ( "Muscular Power" ) ) OR ( TITLE-ABS-KEY ( "Muscle weakness" ) ) OR ( TITLE-ABS-KEY ( "Muscle weaknesses" ) ) OR ( TITLE-ABS-KEY ( "Muscle Weakening" ) ) OR ( TITLE-ABS-KEY ( "Muscular Weakness" ) ) OR ( TITLE-ABS-KEY ( "Paresis" ) ) OR ( TITLE-ABS-KEY ( "Paretic" ) ) OR ( TITLE-ABS-KEY ( "Muscle function" ) ) OR ( TITLE-ABS-KEY ( "Muscle functions" ) ) OR ( TITLE-ABS-KEY ( "Muscle functioning" ) ) OR ( TITLE-ABS-KEY ( "Muscle functionality" ) ) OR ( TITLE-ABS-KEY ( "Muscle Performance" ) ) OR ( TITLE-ABS-KEY ( "Muscle Work" ) ) OR ( TITLE-ABS-KEY ( "Muscular Function" ) ) OR ( TITLE-ABS-KEY ( "Muscular Work" ) ) OR ( TITLE-ABS-KEY ( "Muscular Effort" ) ) OR ( TITLE-ABS-KEY ( "Muscle structure" ) ) OR ( TITLE-ABS-KEY ( "Muscle structures" ) ) OR ( TITLE-ABS-KEY ( "Muscle size" ) ) OR ( TITLE-ABS-KEY ( "Muscle sizes" ) ) OR ( TITLE-ABS-KEY ( "Muscle volume" ) ) OR ( TITLE-ABS-KEY ( "Muscle volumes" ) ) OR ( TITLE-ABS-KEY ( "muscle thickness" ) ) OR ( TITLE-ABS-KEY ( "Muscle fibre" ) ) OR ( TITLE-ABS-KEY ( "Muscle fibres" ) ) OR ( TITLE-ABS-KEY ( "Muscle fiber" ) ) OR ( TITLE-ABS-KEY ( "Muscle fibers" ) ) OR ( TITLE-ABS-KEY ( "Slow-Twitch" ) ) OR ( TITLE-ABS-KEY ( "Fast-Twitch" ) ) OR ( TITLE-ABS-KEY ( "Motor unit" ) ) OR ( TITLE-ABS-KEY ( "Motor units" ) ) |
| 3      | PO   | Search (#1 AND #2)                                                                                                                                                                                                                                                                                                                                                                                                                                                                                                                                                                                                                                                                                                                                                                                                                                                                                                                                                                                                                                                                                                                                                                                                                                                                                                                                                                                                                                                                                                                                                                                                                                                                                                                                                                                                                                                                                                                                                                                                                                                                  |

Search 3 was used to find eligible records

**Table SIII.** Complete search strategy in the electronic Cochrane Central Register of Controlled Trials (CENTRAL) according to the PICO (Population Intervention Comparison Outcome) method

| Search | PICO | Query                                                     |
|--------|------|-----------------------------------------------------------|
| 1      | P    | MeSH descriptor: [Stroke] 1 tree(s) exploded              |
| 2      | P    | ("stroke"): ti, ab, kw                                    |
| 3      | P    | ("Cerebrovascular Accident"): ti, ab, kw                  |
| 4      | P    | ("Cerebrovascular Accidents"): ti, ab, kw                 |
| 5      | P    | ("Cerebral Vascular Accident"): ti, ab, kw                |
| 6      | P    | ("Cerebral Vascular Accidents"): ti, ab, kw               |
| 7      | P    | ("Cerebral Apoplexy"): ti, ab, kw                         |
| 8      | P    | ("Cerebrovascular Apoplexy"): ti, ab, kw                  |
| 9      | P    | ("CVA"): ti, ab, kw                                       |
| 10     | P    | ("CVAs"): ti, ab, kw                                      |
| 11     | P    | #1 OR #2 OR #3 OR #4 OR #5 OR #6 OR #7 OR #8 OR #9 OR #10 |
| 12     | P    | ("Acute"): ti, ab, kw                                     |
| 13     | P    | ("Subacute"): ti, ab, kw                                  |
| 14     | P    | ("Sub-acute"): ti, ab, kw                                 |
| 15     | P    | #12 OR #13 OR #14                                         |
| 16     | P    | #11 AND #15                                               |
| 17     | O    | MeSH descriptor: [Muscle, Skeletal] explode all trees     |
| 18     | O    | ("Skeletal muscle"): ti, ab, kw                           |
| 19     | O    | MeSH descriptor: [Muscular Atrophy] explode all trees     |
| 20     | O    | ("Muscular Atrophy"): ti, ab, kw                          |
| 21     | O    | ("Muscular Atrophies"): ti, ab, kw                        |
| 22     | O    | ("Muscular Atrophias"): ti, ab, kw                        |
| 23     | O    | ("Muscle Wasting"): ti, ab, kw                            |
| 24     | O    | ("Muscle Degeneration"): ti, ab, kw                       |
| 25     | O    | MeSH descriptor: [Sarcopenia] explode all trees           |
| 26     | O    | ("Sarcopenia"): ti, ab, kw                                |
| 27     | O    | ("Sarcopenic"): ti, ab, kw                                |
| 28     | O    | ("Muscle Mass"): ti, ab, kw                               |
| 29     | O    | ("Lean Mass"): ti, ab, kw                                 |
| 30     | O    | ("Lean Tissue"): ti, ab, kw                               |
| 31     | O    | MeSH descriptor [Muscle Strength] explode all trees       |
| 32     | O    | ("Muscle Strength"): ti, ab, kw                           |
| 33     | O    | ("Muscle Strengths"): ti, ab, kw                          |
| 34     | O    | ("Muscular Strength"): ti, ab, kw                         |
| 35     | O    | ("Muscle Force"): ti, ab, kw                              |
| 36     | O    | ("Muscular Force"): ti, ab, kw                            |
| 37     | O    | ("Muscle Power"): ti, ab, kw                              |
| 38     | O    | ("Muscular Power"): ti, ab, kw                            |
| 39     | O    | MeSH descriptor: [Muscle Weakness] explode all trees      |
| 40     | O    | ("Muscle Weakness"): ti, ab, kw                           |
| 41     | O    | ("Muscle Weaknesses"): ti, ab, kw                         |
| 42     | O    | ("Muscle Weakening"): ti, ab, kw                          |
| 43     | O    | ("Muscular Weakness"): ti, ab, kw                         |

**Table SIII (Continued).** Complete search strategy in the electronic Cochrane Central Register of Controlled Trials (CENTRAL) according to the PICO (Population Intervention Comparison Outcome) method

| Search | PICO | Query                                                                                                                                                                                                                                                                                                                                                                                                              |
|--------|------|--------------------------------------------------------------------------------------------------------------------------------------------------------------------------------------------------------------------------------------------------------------------------------------------------------------------------------------------------------------------------------------------------------------------|
| 44     | O    | MeSH descriptor: [Paresis] explode all trees                                                                                                                                                                                                                                                                                                                                                                       |
| 45     | O    | ("Paresis"): ti, ab, kw                                                                                                                                                                                                                                                                                                                                                                                            |
| 46     | O    | ("Paretic"): ti, ab, kw                                                                                                                                                                                                                                                                                                                                                                                            |
| 47     | O    | ("Muscle Function"): ti, ab, kw                                                                                                                                                                                                                                                                                                                                                                                    |
| 48     | O    | ("Muscle Functions"): ti, ab, kw                                                                                                                                                                                                                                                                                                                                                                                   |
| 49     | O    | ("Muscle Functioning"): ti, ab, kw                                                                                                                                                                                                                                                                                                                                                                                 |
| 50     | O    | ("Muscle Functionality"): ti, ab, kw                                                                                                                                                                                                                                                                                                                                                                               |
| 51     | O    | ("Muscle Performance"): ti, ab, kw                                                                                                                                                                                                                                                                                                                                                                                 |
| 52     | O    | ("Muscle Work"): ti, ab, kw                                                                                                                                                                                                                                                                                                                                                                                        |
| 53     | O    | ("Muscular Functioning"): ti, ab, kw                                                                                                                                                                                                                                                                                                                                                                               |
| 54     | O    | ("Muscular Work"): ti, ab, kw                                                                                                                                                                                                                                                                                                                                                                                      |
| 55     | O    | ("Muscular Effort"): ti, ab, kw                                                                                                                                                                                                                                                                                                                                                                                    |
| 56     | O    | ("Muscle Structure"): ti, ab, kw                                                                                                                                                                                                                                                                                                                                                                                   |
| 57     | O    | ("Muscular Structures"): ti, ab, kw                                                                                                                                                                                                                                                                                                                                                                                |
| 58     | O    | ("Muscle Size"): ti, ab, kw                                                                                                                                                                                                                                                                                                                                                                                        |
| 59     | O    | ("Muscle Sizes"): ti, ab, kw                                                                                                                                                                                                                                                                                                                                                                                       |
| 60     | O    | ("Muscle Volume"): ti, ab, kw                                                                                                                                                                                                                                                                                                                                                                                      |
| 61     | O    | ("Muscle Volumes"): ti, ab, kw                                                                                                                                                                                                                                                                                                                                                                                     |
| 62     | O    | ("Muscle Thickness"): ti, ab, kw                                                                                                                                                                                                                                                                                                                                                                                   |
| 63     | O    | MeSH descriptor: [Muscle Cells] explode all trees                                                                                                                                                                                                                                                                                                                                                                  |
| 64     | O    | ("Muscle Fibre"): ti, ab, kw                                                                                                                                                                                                                                                                                                                                                                                       |
| 65     | O    | ("Muscle Fibres"): ti, ab, kw                                                                                                                                                                                                                                                                                                                                                                                      |
| 66     | O    | ("Muscle Fiber"): ti, ab, kw                                                                                                                                                                                                                                                                                                                                                                                       |
| 67     | O    | ("Muscle Fibers"): ti, ab, kw                                                                                                                                                                                                                                                                                                                                                                                      |
| 68     | O    | MeSH descriptor : [Muscle Fibers, Fast-Twitch] explode all trees                                                                                                                                                                                                                                                                                                                                                   |
| 69     | O    | ("Fast-Twitch"): ti, ab, kw                                                                                                                                                                                                                                                                                                                                                                                        |
| 70     | O    | MeSH descriptor : [Muscle Fibers, Slow-Twitch] explode all trees                                                                                                                                                                                                                                                                                                                                                   |
| 71     | O    | ("Slow-Twitch"): ti, ab, kw                                                                                                                                                                                                                                                                                                                                                                                        |
| 72     | O    | MeSH descriptor: [Recruitment, Neurophysiological] explode all trees                                                                                                                                                                                                                                                                                                                                               |
| 73     | O    | ("Motor Unit"): ti, ab, kw                                                                                                                                                                                                                                                                                                                                                                                         |
| 74     | O    | ("Motor Units"): ti, ab, kw                                                                                                                                                                                                                                                                                                                                                                                        |
| 75     | O    | #17 OR #18 OR #19 OR #20 OR #21 OR #22 OR #23 OR #24 OR #25 OR #26 OR #27 OR #28 OR #29 OR #30 OR #31 OR #32 OR #33 OR #34 OR #35 OR #36 OR #37 OR #38 OR #39 OR #40 OR #41 OR #42 OR #43 OR #44 OR #45 OR #46 OR #47 OR #48 OR #49 OR #50 OR #51 OR #52 OR #53 OR #54 OR #55 OR #56 OR #57 OR #58 OR #59 OR #60 OR #61 OR #62 OR #63 OR #64 OR #65 OR #66 OR #67 OR #68 OR #69 OR #70 OR #71 OR #72 OR #73 OR #74 |
| 76     | PO   | #16 AND #75                                                                                                                                                                                                                                                                                                                                                                                                        |

Search 76 was used to find eligible records

## APPENDIX 2. RISK OF BIAS ASSESSMENT-JUDGEMENT CRITERIA.

**Table SIV.** Overview of the judgement criteria to assess risk of bias

| Domain           | Risk    | Judgement criteria                                                                                                                                                                                                                                                                                                                                                                                                                                                                                                                                                                                                                  |
|------------------|---------|-------------------------------------------------------------------------------------------------------------------------------------------------------------------------------------------------------------------------------------------------------------------------------------------------------------------------------------------------------------------------------------------------------------------------------------------------------------------------------------------------------------------------------------------------------------------------------------------------------------------------------------|
| Sampling bias    | High    | Recruitment of volunteers; a convenience sample; patients in only one centre; a specific target population within the eligibility criteria of this systematic review; patients with health problems other than stroke that could affect muscle characteristics.                                                                                                                                                                                                                                                                                                                                                                     |
|                  | Unclear | Insufficient information to permit judgement of "Low risk" or "High risk"; or recruitment of the sample was not addressed.                                                                                                                                                                                                                                                                                                                                                                                                                                                                                                          |
|                  | Low     | The random sample is a truly representation of the target population.                                                                                                                                                                                                                                                                                                                                                                                                                                                                                                                                                               |
| Confounding bias | High    | At least one of the following pre-specified confounding variables was not appropriately identified or not controlled for: Significant age differences between participants at study onset; intake of nutritional supplements (vitamin D, proteins), malnutrition or nutritional interventions; any comorbidity which occurred during the study that might influence the outcome measures of interest; the smoking or non-smoking status of the participants; the level of physical activity (e.g. amount of physical therapy,...) or mobility status (e.g. walking ability, wheelchair-bound) of the participants.                  |
|                  | Unclear | Insufficient information to permit judgement of "Low risk" or "High risk".                                                                                                                                                                                                                                                                                                                                                                                                                                                                                                                                                          |
|                  | Low     | Researchers identified the following pre-specified confounding variables and used an appropriate analysis method that controlled for them: Significant age differences between participants at study onset; intake of nutritional supplements (vitamin D, proteins), malnutrition or nutritional interventions; any comorbidity which occurred during the study that might influence the outcome measures of interest; the smoking or non-smoking status of the participants; the level of physical activity (e.g. amount of physical therapy,...) or mobility status (e.g. walking ability, wheelchair-bound) of the participants. |
| Performance bias | High    | A concurrent intervention or an unintended exposure was overlooked and might have caused bias results; or the study was unfaithful to the assessment protocol (e.g. not the same assessor, not the same time of the day, not the same instrument,...).                                                                                                                                                                                                                                                                                                                                                                              |
|                  | Unclear | Insufficient information to permit judgement of "Low risk" or "High risk".                                                                                                                                                                                                                                                                                                                                                                                                                                                                                                                                                          |
|                  | Low     | Researchers ruled out any impact from a concurrent intervention or an unintended exposure that might bias results; or the study maintained fidelity to the assessment protocol (e.g. same assessor, same time of the day, same instrument,...).                                                                                                                                                                                                                                                                                                                                                                                     |
| Detection bias   | High    | Validity, reliability or responsiveness of one or more outcomes was low that we expect serious confounding; or the outcome measurements of interest are not implemented consistently across all study participants.                                                                                                                                                                                                                                                                                                                                                                                                                 |
|                  | Unclear | Insufficient information to permit judgement of "Low risk" or "High risk".                                                                                                                                                                                                                                                                                                                                                                                                                                                                                                                                                          |
|                  | Low     | All outcome measurements of interest are valid, reliable and responsive measures and implemented consistently across all study participants.                                                                                                                                                                                                                                                                                                                                                                                                                                                                                        |
| Attrition bias   | High    | Reason for missing data likely to be related to true outcome; Subjects lost to follow up likely to introduce bias (number lost more than 20% or description of those lost suggested different from those followed); Potentially inappropriate application of simple imputation.                                                                                                                                                                                                                                                                                                                                                     |
|                  | Unclear | Insufficient reporting of attrition/exclusions to permit judgement of "Low risk" or "High risk" (e.g. number not stated, no reasons for missing data provided); or the study did not address this outcome.                                                                                                                                                                                                                                                                                                                                                                                                                          |
|                  | Low     | No missing data; Missing data have been imputed using appropriate methods; Reason for missing outcome data unlikely to be related to true outcome; Subjects lost to follow up unlikely to introduce bias (number lost less than or equal to 20% or description of those lost suggested no different from those followed).                                                                                                                                                                                                                                                                                                           |
| Reporting bias   | High    | Not all of the study's pre-specified primary outcomes have been reported; One or more primary outcomes were reported using measurements, analysis methods or subsets of the data (e.g. subscales) that were not pre-specified; One or more reported primary outcomes were not pre-specified (unless clear justification for their reporting is provided, such as an unexpected adverse effect).                                                                                                                                                                                                                                     |
|                  | Unclear | Insufficient information to permit judgement of "Low risk" or "High risk".                                                                                                                                                                                                                                                                                                                                                                                                                                                                                                                                                          |
|                  | Low     | The study protocol is available and all of the study's pre-specified outcomes that are of interest in the review have been reported in the pre-specified way; The study protocol is not available but it is clear that the published reports include all expected outcomes, including those that were pre-specified (convincing text of this nature may be uncommon).                                                                                                                                                                                                                                                               |
